# Supplementary material for: CYCD3 D-type cyclins regulate cambial cell proliferation and secondary growth in Arabidopsis
Source: PubMed Central journal article supplement (PMC4507761; doi:10.1093/jxb/erv218), 2015-05-28

CYCD3 D-type cyclins regulate cambial cell proliferation and secondary growth in *Arabidopsis*.

Carl Collins, Maruthi M.N and Courtney E. Jahn

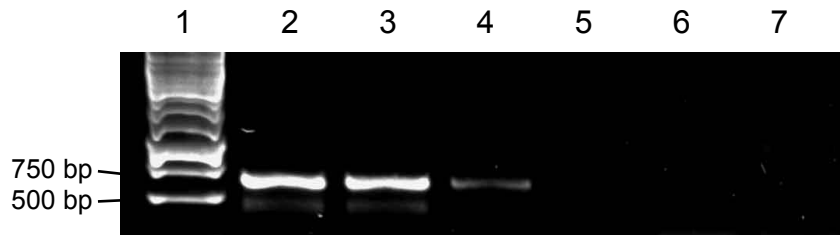

CYCD3 D-type cyclins regulate cambial cell proliferation and secondary growth in *Arabidopsis*. Carl Collins, Maruthi M.N., Courtney E. Jahn.

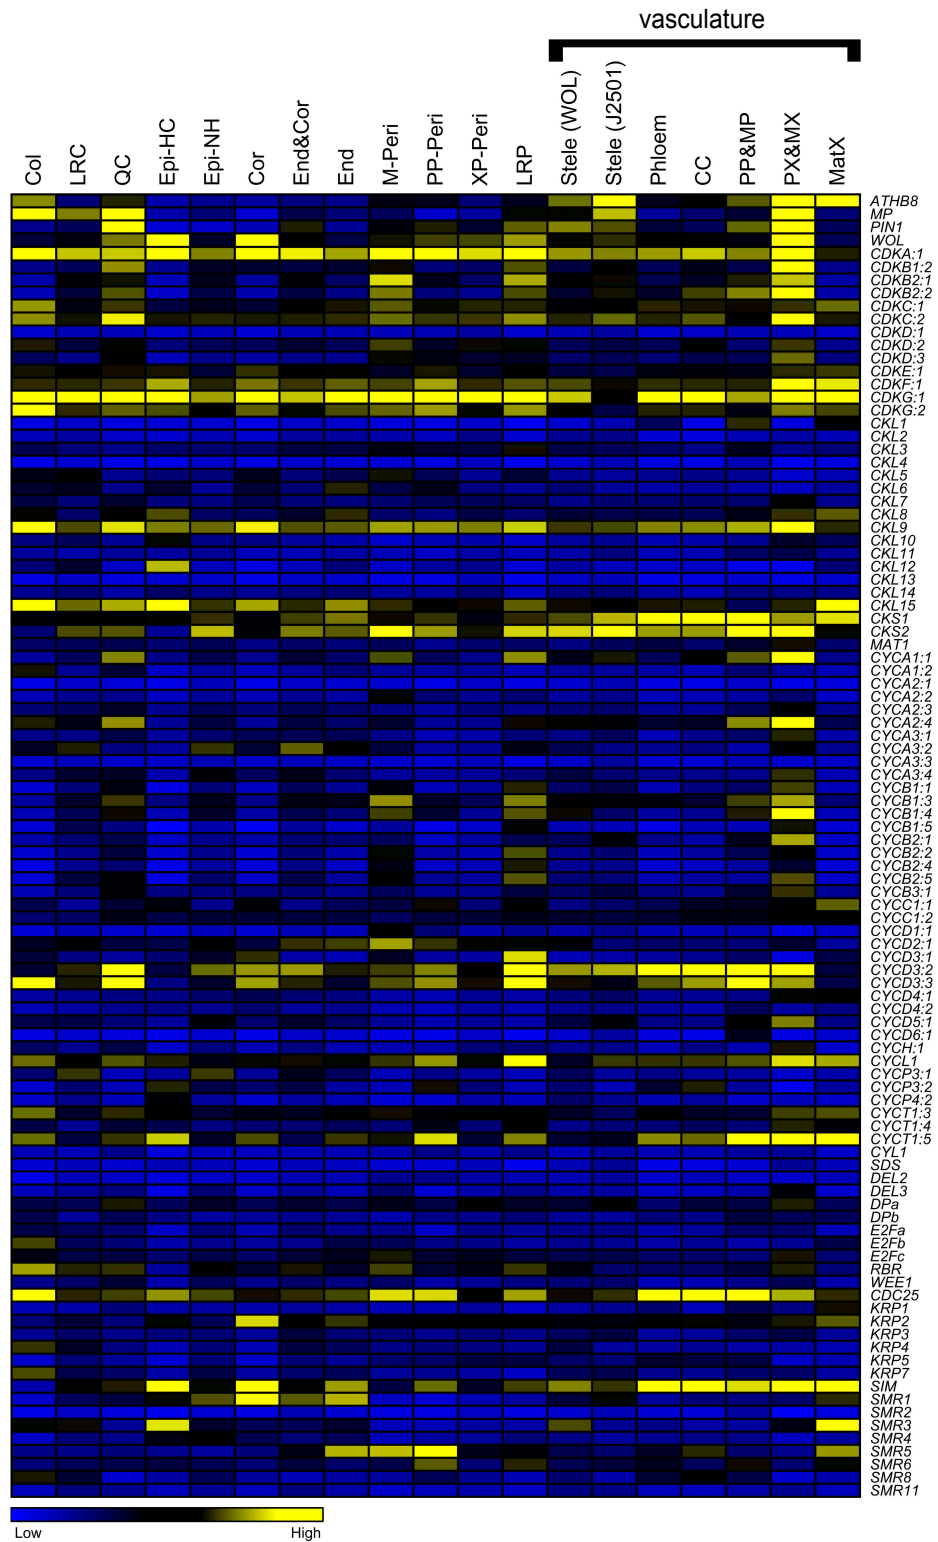

CYCD3 D-type cyclins regulate cambial cell proliferation and secondary growth in *Arabidopsis*.

Carl Collins, Maruthi M.N and Courtney E. Jahn

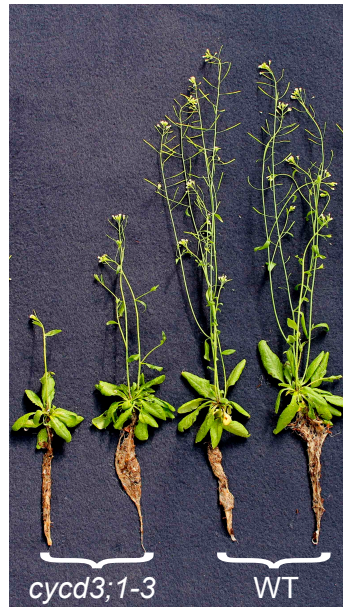

CYCD3 D-type cyclins regulate cambial cell proliferation and secondary growth in *Arabidopsis*.

Carl Collins, Maruthi M.N and Courtney E. Jahn

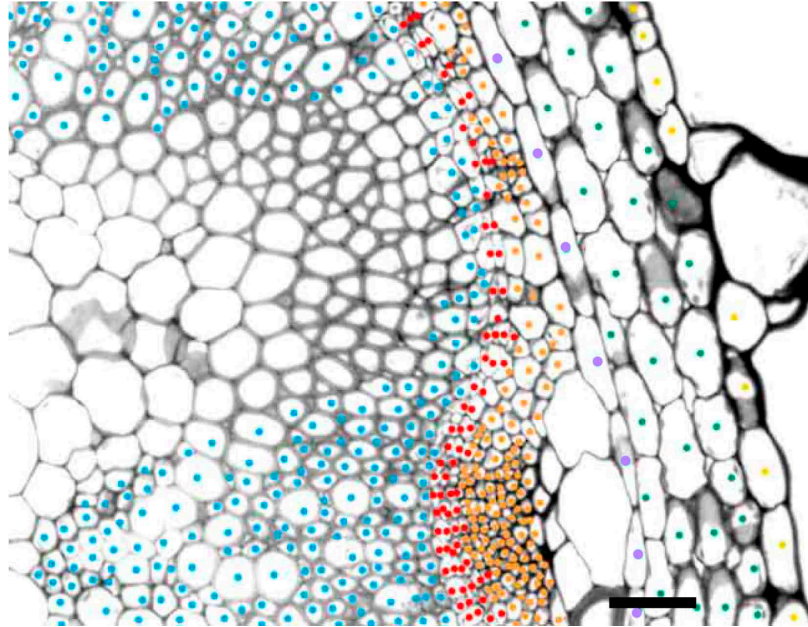

Supplement: supp_erv218_jexbot137620_file001.pdf [file supp_erv218_jexbot137620_file001.pdf]
